# Supplementary material for: The seismogenic fault system of the 2017 M w 7.3 Iran-Iraq earthquake: constraints from surface and subsurface data, cross-section balancing and restoration
Source: Copernicus journal article supplement (doi:10.5194/se-2018-21), 2018-03-19
Supplement: Supplementary file [file se-2018-21-AC2-supplement.pdf]

The seismogenic fault system of the 2017  $M_w$  7.3 Iran-Iraq earthquake: constraints from surface and subsurface data, cross-section balancing and restoration

Stefano Tavani<sup>1</sup>, Mariano Parente<sup>1</sup>, Francesco Puzone<sup>1</sup>, Amerigo Corradetti<sup>1</sup>, Gholamreza  
5 Gharabeigli<sup>2</sup>, Mehdi Valinejad<sup>2</sup>, Davoud Morsalnejad<sup>2</sup>, Stefano Mazzoli<sup>1</sup>

1 DISTAR. Università degli Studi di Napoli “Federico II”. Napoli, Italy.

2 N.I.O.C., Tehran, Iran.

Corresponding author: Stefano Tavani, [stefano.tavani@unina.it](mailto:stefano.tavani@unina.it)

10

## Abstract

The 2017  $M_w$  7.3 Iran-Iraq earthquake occurred in a region where the pattern of major plate convergence is well constrained, but limited information is available on the seismogenic structures. Geological observations, interpretation of seismic reflection profiles, and well data  
15 are used in this paper to build a regional balanced cross-section that provides a comprehensive picture of the geometry and dimensional parameters of active faults in the hypocentral area. Our results indicate: (i) coexistence of thin- and thick-skinned thrusting, (ii) reactivation of inherited structures, and (iii) occurrence of weak units promoting heterogeneous deformation within the Paleo-Cenozoic sedimentary cover and partial  
20 decoupling from the underlying basement. According to our study, the main shock of the November 2017 seismic sequence is located within the basement, along the low-angle Mountain Front Fault. Aftershocks unzipped the up-dip portion of the same fault. This merges with a detachment level located at the base of the Paleozoic succession, to form a crustal-

scale fault-bend anticline. Size and geometry of the Mountain Front Fault are consistent with a down-dip rupture width of 30 km, which is required for an  $M_w$  7.3 earthquake.

## Introduction

5 On November 12, 2017, a  $M_w$  7.3 earthquake struck the north-western portion of the Lurestan region of the Zagros Belt, at the boundary region between Iran and Iraq (Fig. 1). This earthquake had a thrust fault plane solution with a  $351^\circ$ -striking and  $16^\circ$ -dipping nodal plane. The other nodal plane has a strike of  $122^\circ$  and a dip of  $79^\circ$ . The P axis plunges  $33^\circ$  toward  $223^\circ$ , whereas the T axis plunges  $54^\circ$  toward  $18^\circ$  (Fig. 1) (Source: USGS,  
10 <https://earthquake.usgs.gov>). These parameters indicate SW-directed co-seismic slip along a low-angle thrust, such a direction being nearly perpendicular to the strike of the Zagros Belt and of its main thrust systems. The hypocenter is located at a depth of ca. 20-km where, according to preliminary teleseismic data, the slip was nearly 9 m (Utkucu, 2017). Coherently with SW-directed motion along a gently dipping thrust, interferometric SAR data show a  
15 NW-SE to NNW-SSE-elongated displacement field (Fig. 2). Consistently, the maximum surface deformation (reaching ca. 90 cm of uplift; Kobayashi et al., 2018) is shifted some tens of km SW-ward of the epicentre of the main shock. Forty-five  $M_w > 4$  aftershocks followed during the next 30 days in a N-S-elongated, 50x150 km area located to the west of the main shock (Fig. 2). Aftershocks lined up, as most of the major earthquakes of the last 50 years  
20 (Berberian, 1995; Talebian and Jackson, 2004), along the Mountain Front Flexure (Figs. 1, 2), a major tectonic lineament of the area. However, the instrumental seismic record indicates that this structure had never produced a  $M_w > 7$  earthquake in last decades. Identifying the fault or fault segment activated during the seismic event, and defining its dimensional

parameters, is thus essential for the assessment of the seismic hazard (Wells and Coppersmith, 1994).

In seismically active fold and thrust belts (FTBs), where the earthquake dataset is not sufficiently robust to constrain the geometry of active faults, deep cross-sections built using balancing techniques (Dahlstrom, 1969; Hossack, 1979) have been successfully used to improve the knowledge of the seismogenic structures, as carried out in (e.g.) the Los Angeles area (Shaw and Suppe, 1996; Davis et al., 1989), Taiwan (Yue et al., 2005; Mouthereau and Lacombe, 2006), and the Longmen Shan FTB (Wang et al., 2013). In the Zagros FTB, many of the largest earthquakes are associated with major reverse faults affecting the Precambrian basement (e.g. Jackson, 1980; Berberian, 1995; Talebian and Jackson, 2004), which are included in almost all the published balanced cross-sections across the belt (Blanc et al., 2003; Molinaro et al., 2005; Mouthereau et al., 2007; Vergés et al., 2011). Despite being located more than 200 km away from the epicentral area, these cross sections suggest that the seismogenic structure of the  $M_w$  7.3 earthquake could be related with the Mountain Front Flexure, which extends across the aftershock area of the November 2017 earthquake (Figs. 1,2). The flexure, across which a marked variation of both topography and structural relief occurs (Falcon, 1961), is commonly interpreted as produced by a large underlying basement thrust, namely the Mountain Front Fault. This structure is thus a candidates as the seismogenic fault of the recent  $M_w$  7.3 earthquake.

Geological observations of faults and folds affecting Meso-Cenozoic rocks exposed in the epicentral area are reported in this study. These observations were integrated with the interpretation of near vertical seismic reflection profiles calibrated with well logs, allowing us to produce a detailed and well-constrained geological cross-section reaching a depth ranging from 2 to 5 km. The section was then completed at depth by using the balancing technique

(e.g. Dahlstrom, 1969; Hossack, 1979). Our results indicate that the November 2017 seismic activity is attributable to the Mountain Front Fault, for which, using the balancing technique, we reconstructed 10 km of cumulative displacement in the hypocentral area.

## 5 Geological background

The NW-SE striking Zagros mountain belt formed due to the continental collision between the Arabian and Eurasian plates (Vergés et al., 2011; Berberian and King, 1981; Alavi, 1994; 2007; Argand et al., 2005; Mouthereau et al., 2006). The present-day northward motion of Arabia relative to fixed Eurasia is about 2 cm/yr (Vernant et al., 2004). This is  
10 partitioned between right-lateral motion along NE-SW-striking faults and NE-SW oriented shortening (Blanc et al., 2003; Vernant et al., 2004; Talebian and Jackson, 2002; 2004), which in the Zagros belt is about 5-10 mm/yr (Vernant et al., 2004). The belt is bounded to the NE by the Main Recent Fault and Main Zagros Fault (Fig. 1), forming the suture zone that separates terrains derived from the Mesozoic conjugate margins of the Neo-Tethyan ocean.  
15 The Zagros FTB, to the SW of the suture, involves units originally pertaining to the Arabian continental margin (Ziegler, 2001; Blanc et al., 2003; Sepehr and Cosgrove, 2004; Ghasemi and Talbot, 2006; Mouthereau et al., 2012; English et al., 2015). Within the Zagros FTB, the High Zagros Fault, a major structure striking NW-SE, separates the Imbricate Zone to the NE, where intensely faulted and folded units are exposed, from the Folded Belt to the SW  
20 (Blanc et al., 2003; Karim et al., 2011; Vergés et al., 2011). The SW boundary of the Zagros FTB is the Mountain Front Flexure, corresponding to a basement and topographic step that divides the belt from its foreland basin to the SW (Falcon, 1961). The flexure has a sinusoidal shape, defining salients and recesses along the belt. The seismic sequence of the November 2017 earthquake locates at the boundary between two of them, namely the Kirkuk

embayment and the Lurestan arc (Figs 1, 2). Folds and thrusts of the Folded Belt of the Kirkuk embayment and of the Lurestan arc are NW-SE-striking, becoming locally NNW-SSE-trending along the boundary between the two domains. There, a major bend of the Mountain Front Flexure occurs (Vergés et al., 2011; Sadeghi and Yassaghi, 2016; [Koshnaw et al., 2017](#)) (Figs. 2,3). Indeed, the envelope of NNW-SSE striking en-echelon folds along the Mountain Front Flexure in the epicentral area of the November 2017 earthquake roughly runs N-S (Fig. 2). This is interpreted as being associated with the occurrence of a N-S-striking basement fault (i.e. the Khanaqin Fault; e.g. Berberian, 1995; Hessami et al., 2001; [Lawa et al., 2013](#); [Allen et al., 2013](#)) that should presently act as a right-lateral fault. Folds in the Lurestan arc affect an about 10 km-thick sedimentary succession (Hessami et al., 2001; Ziegler, 2001; Homke et al., 2009; Vergés et al., 2011; English et al., 2015). In detail, the uppermost Proterozoic basement of the Arabian plate in the Lurestan region is overlain by a nearly 3000 m thick Paleozoic succession dominated by continental elastic deposits (Jassim and Goff, 2006; Bordenave, 2008). The strong rheological contrast between the crystalline basement and the overlying sedimentary cover makes the basement-cover interface a major decollement horizon of the Lurestan region (e.g. Vergés et al., 2011), despite the lack of evidence for the occurrence of the Hormuz salt at the base of the sedimentary pile of the study area. Permian rifting, related to the opening of the Neo-Tethys ocean (Berberian and King, 1981; Sepehr and Cosgrove, 2004; Ghasemi and Talbot, 2006), led to the deposition of about 1 km of shallow-water carbonates (Chia Zairi Fm.) (Jassim and Goff, 2006; Bordenave, 2008), with at the base some tens of meters of shales, forming a mobile level sandwiched between two competent packages (Fig. 3). With continuing passive margin subsidence, nearly 1800 m of Triassic-Lower Jurassic shallow-marine carbonates and evaporites, with minor shales, accumulated (Mirga Mir to Sekhaniyan Fm.) (Jassim and Goff, 2006; Bordenave,

2008). This interval is essentially formed by competent units, with the exception of the about 100 m thick Baluti and Bedu shales Fms., at the top and base of the Triassic succession, respectively. This is a remarkable difference with respect to the Fars and Dezful Embayment areas to the SE of the Zagros Belt, where the dolostones and limestones of the Triassic Kurra  
5 Chine Fm. are substituted by the evaporite-dominated Dashtak Fm., which there acts as a major decollement level. A major late Early to Middle Jurassic subsidence pulse led to carbonate platform drowning and deposition of about 100 m of relatively deep-water limestones, marls and black shales and evaporites (Sargelu, Naokelekan, Barsarin Fm., Toarcian to Tithonian), followed by 700 m of Cretaceous basinal limestones, shales and marls  
10 (Garau, Sarvak and Ilam Fms) (Jassim and Goff, 2006; Bordenave, 2008). The closure of the Neo-Tethys Ocean during the Late Cretaceous led to the formation of a flexural basin, filled by a ca. 2 km thick Maastrichtian to Eocene succession (Hessami et al., 2001; Homke et al., 2009; Vergés et al., 2011; Saura et al., 2015), evolving from deep-marine marls and limestones to a prograding wedge of deep marine to continental clastic sediments. This first  
15 foredeep infill is overlain by about 500 m of shallow-water carbonates of the Shahbazan and Asmari Fm (Oligocene-lower Miocene), passing upward to lower Miocene evaporites. Renewed shortening and thrusting from the late Miocene to the recent led to the deposition of a younger foreland basin clastic infill (Fig. 3) (Hessami et al., 2001; Jassim and Goff, 2006; Homke et al., 2009).

20

### **NE-SW geological cross-section**

In this paragraph we present a NW-SE-oriented geological section across the study area. The section is divided into two portions. Figures 4 and 5 illustrate the NE and SW portion of the section, respectively (with a small overlap area). Two seismic reflection

profiles running at a low angle to the geological cross-section trace are projected onto the section plane, and key field observations along the NE portion of the section are also reported in figure 4.

The High Zagros Fault to the NE of the study area intersects the cross section of figure 4 in its northern portion. There, the major thrust fault dips roughly parallel to the strata of both hanging-wall and footwall blocks (i.e the cutoff angles are close to zero). Cretaceous strata in the footwall are affected by the NW-SE striking, tens of km-long thrusts of the Satiary Thrust System. These thrusts have low ( $< 10^\circ$ ) hanging-wall and footwall cutoff angles (Fig. 4). Along the section, the Garau Fm. sits in the hanging wall of the thrust and the Ilam Fm. lies in its footwall. However, the geological map of figure 3 shows that the Sehkanian Fm. is the oldest exposed unit in the hanging-wall block and that it is thrust on top of the Upper Cretaceous Gurpi Fm. (see also the field photograph of figure 4), which lies about 1000 m higher in the stratigraphic column. This feature, coupled with the observed hanging-wall flat on footwall flat relationship, suggests displacements in the order of several kilometres. In the footwall of the Satiary thrust system, Upper Triassic to Cretaceous strata are, as a whole,  $20\text{-}30^\circ$  NE-dipping for about 4 km, until they meet the tens of kilometres long Herta Thrust System. This includes two  $30^\circ$ -dipping thrusts (joining SE-ward; Fig. 3) showing very low cutoff angles and separating the Triassic Sarki Fm. in the hanging wall of the trailing thrust from the Sargelu and Garau fms. in its footwall (Fig. 4). The repetition of hanging-wall flat on footwall flat geometries (Fig. 4) indicates a remarkable (i.e. several kilometres) displacement also for the Herta Thrust system.

Near-vertical reflection seismic profiles in this northern area are affected by a significant noise; however, both the Satiary and the Herta thrust systems are imaged at depth (Fig. 4) displaying very low cutoff angles, which confirms their significant horizontal displacement.

Folds associated with the Herta and Satiary thrust systems are truncated by the High Zagros Fault in the SE portion of the study area. This may be observed in the eastern portion of the geological map of figure 3 and, more in detail, in the photograph of figure 4, where the sub-horizontal High Zagros Fault truncates an anticline exposing the Gurpi Fm. in the limbs and the Ilam Fm. in the core. This observation constrains the relative timing of development of these structures, pointing to an out of sequence emplacement (or reactivation) of the High Zagros Fault, which post-dates the development of the Herta and Satiary fault systems. Moving to the southwest, the Marakhil Anticline exposes the Geli Khana Fm. in its core, and the seismic profile indicates that the Paleozoic strata are folded as well. The Marakhil Fault, bounding the anticline to the SW, has a high ( $> 60^\circ$ ) hanging-wall cutoff angle, typical of a reactivated (i.e. positively inverted) extensional fault (e.g. Sibson, 1985; Williams et al., 1989). The fault flanks to the NE an about 5 km-wide gentle syncline affected by low-displacement (i.e.  $< 100$  m) reverse faults with both low (e.g. the Qlaji Thrust) and high (e.g. the Bawrol Thrust) cutoff angles. In detail, similarly to the Marakhil Fault, the Bawrol Thrust has a hanging-wall cutoff angle typical of a positively inverted normal fault, whosethe original extensional activity of which post-dated the deposition of the Sehkaniyan Fm.. Indeed, syn-kinematic thickening of the Sargelu, Naokelekan, and Barsarin formations (S-N-B in Fig. 4) observed across the Marzan extensional fault, as well as wedging of the same formations in the hanging wall of the Qlaji Thrust, indicate that many of the previously illustrated inverted faults (affecting Triassic and Jurassic strata), developed during a Middle Jurassic extensional pulse. The Sheykh Saleh Anticline is another major structure of this part of the Lurestan region. It separates an area to the SW, where the oldest rocks exposed in the cores of the anticlines (Gheytleh, Azgaleh, and Miringeh anticlines) belong to the Upper Cretaceous Ilam Fm., from an area to the NE where the oldest rocks exposed at the core of



the anticlines belong to the Triassic Kurra Chine and Geli Khana Fms (Fig. 3). The NE block has a structural relief of about 2 km. Despite the significant noise affecting the seismic section, the Ilam and Sehkaniyan Fms. are clearly imaged in the subsurface of the area SE of the Sheykh Saleh Anticline (Fig. 5). Both formations are made of carbonates and are capped by shales and marls of the Sargelu and Gurpi Fms., respectively, this making their top strongly reflective and recognisable. The first clear occurrence of the top Sehkaniyan reflectors is underneath the southwestern limb of the Gheytureh Anticline, at about 1 s TWT (Fig. 5), entirely consistent with the dip and thickness of the overlying stratigraphic units. These Sehkaniyan reflectors are SW-dipping and become NE-dipping about 2 km to the SW, below the syncline flanking to the SW the Gheytureh Anticline. This coherence between surface and subsurface geometries points to a roughly parallel folding of the entire package overlying the Sehkaniyan Fm. About 1 km to the SW, also the top Ilam reflectors become recognisable. Further to the SW, starting from the Azgaleh Anticline area, reflectors are calibrated with well logs and exposures of the top Ilam Fm. In this southwestern portion of the section, the envelope of the top of the Ilam and Sehkaniyan formations defines a 2-5° SW-dipping, regional-scale panel, with limited decoupled deformation between the Mesozoic and Cenozoic units due to the occurrence of a weak package comprised between the stiff Ilam and Asmari Fms. This shallow-dipping faulted and folded panel terminates at the Miringeh Anticline, which displays an unfaulted forelimb. There the strata of the entire Paleozoic to Cenozoic sedimentary succession are parallel and form a 10 km wide SW-dipping monocline. More in detail, below the Miringeh Anticline, a gentle unconformity occurs between the Middle and Upper Paleozoic reflectors, evidencing the occurrence of middle Paleozoic deformation. ~~The above mentioned monocline is latter~~ is bounded by two N-S striking anticlines cored by the Asmari Fm.; below them, a repetition of the Mesozoic reflectors is

observed, which is produced by a backthrust. At the SW termination of the seismic sections, the entire Paleozoic to Cenozoic sedimentary succession becomes horizontal and forms a large-scale syncline.

## 5 **Balancing the cross-section**

The cross-section shown in figures 4 and 5 is completed at depth by producing a geological solution (Fig. 6) in which line-length preservation during folding and thrusting is assumed (e.g. Dahlstrom, 1969; Hossack, 1979). The balanced cross-section is built along a direction oriented N49°, which is perpendicular to the trend of major folds and thrusts. These structures display negligible regional plunge along the section, which allows us to use a vertical plane to build the section. This also ensures the absence of remarkable out-of-plane motion and allows us to directly compute the thickness of the exposed Mesozoic and Cenozoic units along the section. The chosen section plane forms an angle of 17° with the N215°-striking and 78° dipping plane containing the P and T axes of the of the 2017  $M_w$  7.3 earthquake, thus representing a proper section to obtain insights on the seismogenic structures.

Some lateral thickness variations, in the order of some tens of metres, are observed for the package comprised between the Sargelu and Barsarin fms.. The Sehkaniyan and Sarki fms. also display lateral thickness variations of the same order of magnitude. In the Geli Khana and Kurra Chine fms. we have not observed any kind of growth structure, and the parallelism between reflectors observed in the seismic line of figure 4 indicates that the thickness of these formations can be considered roughly constant. These observations indicate that, as a whole, a constant thickness can be used for the almost 2 km thick package comprised between the base of the Geli Khana Fm. and the base of the Garau Fm.. The overlying units are not continuously exposed in the northern part of the section and, because

of that, they are not shown in the restoration. The Paleozoic units and the basement, for which only limited and discontinuous information is available, are modelled using 1 km and 2 km thick layers, respectively. For the sake of simplicity, thickness variations in Upper Paleozoic units are firstly neglected and then re-introduced after cross-section balancing. This  
5 because the adoption of constant thickness for the entire upper crust and of flexural slip folding allowed us to assume line-length preservation. Coherently, the restored cross section shows the cumulative length of Mesozoic, Paleozoic, and basement layers. The trace of the faults in the restored section is obtained by smoothing the polyline built by connecting the restored cutoff points. This is done to avoid zig-zag effects and, in any case, smoothing is less  
10 than 0.5% of the original cutoff point position.

Coherently with field observation, in our reconstruction thrusts to the NE of the Marakhil Anticline are thin-skinned and have a displacement in the order of some kilometres. They splay off from a basal decollement located at the bottom of the Triassic sequence, namely within the Bedu Shale, sandwiched between the competent Chia Zairi and Geli  
15 Khana-Kurra Chine packages. The Marakhil Anticline is instead a deeply rooted structure, associated with the Marakhil inverted normal fault, which is observed at the surface (Fig. 4). The simple shallow geometry of this large wavelength fold introduces a geometrical problem at depth, as two solutions can be applied to model the deeper portion of the anticline. In the first one, the inverted fault affects only the sedimentary cover, the core of the anticline is  
20 filled by ductile material and the underlying basement is not involved in faulting and folding. In the second solution, the inverted fault involves also the basement. The lack of a sufficiently thick ductile layer at the base of the Paleozoic sequence, and the occurrence of a structural step across the Marakhil Anticline, are more compatible with the second, basement-involved, solution. Following this structural model, and keeping constant the line-length of

both basement and cover, we solved the geometry in the core of the anticline by assuming the occurrence of a footwall shortcut of the inverted normal faults in the basement. This represents a typical feature associated with the inversion of normal faults (e.g. McClay, 1989). In our solution, this shortcut transfers displacement from the main reactivated fault to the base of the sedimentary cover. Low-displacement, SW-verging reverse faults and a major back-thrust accommodate such a displacement in the Mesozoic and Paleozoic strata, respectively. The Sheykh Saleh Anticline to the SW shows a similar deep structure, which is even better supported by the remarkable structural step occurring at this location. Here, a positively inverted normal fault with a footwall shortcut occurs in the basement. The footwall shortcut transfers displacement from the main reactivated fault to the base of the sedimentary cover sequence. Such a displacement is accommodated by folding and faulting of the sedimentary cover, with the Paleozoic or Lower Triassic incompetent units (i.e. the Bedu Shale Fm or the shaly level at the base of the Chia Zairi Fm.) promoting decoupling between Mesozoic and Paleozoic strata. In our interpretation, a positively inverted normal fault bounds to the NE the Miringeh Anticline too, producing the uplift of the crustal block in its hanging wall and preventing the southward propagation of the deformation of the sedimentary cover. Indeed, Paleozoic to Cenozoic strata in the crest and in the wide, homogeneously dipping SE limb of this anticline are parallel, unfolded and unfaulted. This limb is underlain by a basement low-angle thrust, corresponding to the Mountain Front Fault, on which the main shock is located (Fig. 6). The focal mechanism provided by the USGS indicates a 351°-striking and 16° dipping thrust fault ~~and, whose~~ its intersection with our N49°-striking vertical section gives 14° of apparent dip. Coherently, in our reconstruction the thrust dips 15° at the hypocentral depth and becomes almost sub-horizontal upward, where it reactivates the basement-cover interface. A back-thrust splays from this upper flat,

accommodating part of the displacement transferred from the main ramp of the Mountain Front Fault, and forming together with it a fishtail structure responsible for the surface deformation observed from interferometric data. The position of such a back-thrust roughly coincides with the Khanaqin Fault (e.g. Lawa et al., 2013) (Fig. 3), which accordingly must be downgraded to accommodation structure of the Mountain Front Fault.

An independent quality check of our reconstruction is provided by the top of magnetic basement data (Fig. 6), ~~whose top is~~ computed according to the regional depth map in Teknik and Ghods (2017). The depths of the crystalline basement underlying the sedimentary cover and the top of the magnetic basement obviously do not coincide, due to the heterogeneous nature of the magnetic basement. However, their large-scale shape is similar, confirming the occurrence of highs and lows predicted by our reconstruction. The restored length of the section is 104 km, with a negligible maximum error of 1.5%. The total shortening is 20 km, 8 km of which being associated to the thin-skinned Satiary and Herta thrust systems to the NE of the Marakhil Anticline. As previously mentioned, these thrusts are truncated by the High Zagros Fault, which in this area was active during the Late Cretaceous to Paleocene interval (Karim et al., 2011; Vergés et al., 2011; Saura et al., 2015). These thrusts have also anomalously high displacements compared to the other structures along the section. For both reasons, the Satiary and Herta thrust systems are interpretable as footwall splays of the High Zagros Fault, probably merging with it to the NE, outside the section. Lower displacements are instead associated with the Marakhil (2.5 km), Sheykh Saleh (2.0), and Miringeh (1.0) faults, the amount of shortening accommodated in the area between the Marakhil and Miringeh anticlines being 5.3 km. The remaining shortening is accommodated by the Mountain Front Fault and associated structures.

## Discussion

According to our reconstruction, the Mountain Front Fault has 9.7 km of cumulative displacement at 20 km depth, where the main shock nucleated. The displacement decreases upward, becoming 5.8 km at the upper flat. About 1 km of this is accommodated by the frontal back-thrust, i.e. by the Khanaqin Fault, while 4.3 km of shortening is transferred to the foreland structures to the SW of our balanced-cross section. Such an expected shortening in the foreland is highly in agreement with data derived from cross-section balancing in the Kirkuk embayment, where 5 km of shortening have been proposed by Obaid and Allen (2017). The computed 9.7 km of displacement of the Mountain Front Fault at the hypocentre are broadly consistent with the 13 km proposed for the same structures 200 km to the SE (Blanc et al., 2003; Vergés et al., 2011). The earthquakes of the November 2017 seismic sequence can thus be attributed to movement of the Mountain Front Fault, which forms part of a thrust system splaying from a mid-crustal decollement (Vergés et al., 2011), similar to that documented in other FTBs (Cristallini and Ramos, 2000; Lacombe and Mouthereau, 2002; Butler et al., 2004; Lacombe and Bellahsen, 2016). The important occurrence of reactivated extensional faults documented in this study suggests that the mid-crustal decollement could represent a reactivated inherited extensional decollement (e.g. Marshak et al., 2000; Tavani., 2012).

Interferometric data show that the maximum surface deformation occurs at the SW edge of the geological section (Fig. 6). This reveals that the coseismic displacement has induced slip along the shallower, near horizontal, upper flat located 20 km to the SW of the main shock, at the basement-cover interface. Decoupling between the Mesozoic and Paleozoic successions, and between Paleozoic strata and the basement, has strong implications in terms of seismic potential. As already pointed out by Nissen et al. (2011),

decoupling at the base of the cover sequence implies vertically confined faults, with down-dip width smaller than 8 km. In fact, only four faults affect the entire upper crust: the three major steeply-dipping inverted normal faults splaying out from the basal decollement, probably corresponding to the brittle-ductile transition, and the Mountain Front Fault. The former ones, with their cross-sectional length of up to 25 km, can generate a down-dip rupture width exceeding 8 km, required for an  $M_w$  6 earthquake (Wells and Coppersmith, 1994). On the other hand, the Mountain Front Fault is the only fault on which a down-dip rupture width of 30 km, required for an  $M_w$  7.3 earthquake, may occur.

Beyond their importance for seismic hazard assessments, the data illustrated in this work have major implications in terms of a better understanding of thrust tectonics in the Zagros Mountains. The occurrence of salients and recesses is a common feature in fold and thrust belts (Marshak, 1988) including the Zagros, where different mechanisms are invoked to explain the occurrence of bends in the trace of the Mountain Front Fault (e.g. [Berberian, 1995](#); [Talbot and Alavi, 1996](#); [Bahroudi and Koyi, 2003](#); [Allen and Talebian, 2011](#); [Navabpour et al., 2014](#); [Malekzade et al., 2016](#), and references therein). According to the scaling relationship of magnitude vs. rupture area (Wells and Coppersmith, 1994), the rupture area for the Iran-Iraq  $M_w$  7.3 earthquake should exceed  $10^3$  km<sup>2</sup>. Therefore, the low-angle Mountain Front Fault must extend in the area where the Mountain Front Flexure runs roughly N-S (Figs. 2, 3). This, coupled with the N-S clustering of aftershocks (Fig. 2) triggered by [SEW](#) directed co-seismic slip along the low angle thrust ramp, clearly points to the occurrence of a lateral ramp beneath the N-S segment of the Mountain Front Flexure at the boundary between the Kyrkuk embayment and the Lurestan arc. [As previously mentioned, the N-S striking Khanaqin Fault \(e.g. Berberian, 1995; Hessami et al., 2001; Lawa et al., 2013; Allen et al., 2013\), in our structural reconstruction becomes an accommodation](#)

structure of the Mountain Front Fault. A further implication of our work concerns the role structural inheritance in the Zagros FTB. The age of rifting and passive margin development is still a matter of debate in the tectonic puzzle of the area. A Permian to Early Triassic age is commonly inferred for the onset of rifting in the Zagros area (e.g. Berberian and King, 1981; 5 Ghasemi and Talbot, 2006). However, we observed extensional structures that developed synchronously with the deposition of the Middle Jurassic Sargelu Fm., the Marzan extensional Fault (Fig. 4) being the most striking one. The positively inverted Marakhil and Bawrol faults, affecting Upper Triassic and Lower Jurassic units (thus younger than the main rifting event) also fit well into an Early to Middle Jurassic extensional episode. Such an 10 extensional pulse could also explain the drowning of the long-lived Triassic-Jurassic carbonate platform and the onset of deep-water conditions in the area (Ziegler, 2001; Jassim and Goff, 2006; Bordenave, 2008). Accordingly, for many of the inverted basement extensional faults, a polyphase extensional history could be proposed, including a Permo-Triassic development and a Middle Jurassic extensional reactivation. An even older, Middle 15 Paleozoic origin can be inferred for some of these faults, based on the occurrence of a Middle Paleozoic unconformity seen in some seismic lines (Fig. 5).

## Conclusions

The integration of field data, near vertical seismic reflection profiles, and earthquake 20 data, allowed us to provide a comprehensive picture of the geometry and dimensional parameters of the faults in the hypocentral area of November 2017 seismic sequence at the Iran-Iraq border. The tectonic framework of this area includes a likely mid-crustal decollement level at a depth of ca. 20 km, from which high angle positively inverted normal faults splay off. At its southwestern edge, the decollement ramps up, to form the Mountain



Front Fault, which joins southward an upper decollement level located at the basement-cover interface. The occurrence of multiple decollement levels in the sedimentary succession promotes a partly decoupled deformation, and limits the size of most of the faults of the area. The main shock of the November 2017  $M_w$  7.3 earthquake nucleated in the basement, along  
5 the Mountain Front Fault. Co-seismic slip unzipped the shallower portion of the fault to the SW, at the basement-cover interface, and activated structures responsible for the observed surface deformation.

### **Acknowledgments**

10 We acknowledge the use of imagery from the Land Atmosphere Near-real time Capability for EOS (LANCE) system, operated by the NASA/GSFC Earth Science Data and Information System (ESDIS) with funding provided by NASA/HQ, and of Copernicus Sentinel data 2017, processed by ESA. The geological cross sections presented in this work were constructed  
15 sections and wells data should be submitted to the National Iranian Oil Company.

## References

- Agard, P., Omrani, J., Jolivet, L., Mouthereau, F. (2005) Convergence history across Zagros (Iran): Constraints from collisional and earlier deformation. *International Journal of Earth Sciences*, 94, 401-419. DOI: 10.1007/s00531-005-0481-4
- 5 Alavi, M. (1994) Tectonics of Zagros Orogenic Belt of Iran, New Data and Interpretation. *Tectonophysics*, 229, 211-238. DOI:10.1016/0040-1951(94)90030-2.
- Alavi, M. (2004) Regional stratigraphy of the Zagros fold-thrust belt of Iran and its proforeland evolution. *American Journal of Science*, 304, 1-20. DOI: 10.2475/ajs.304.1.1
- 10 Alavi, M. (2007) Structures of the Zagros fold-thrust belt in Iran. *American Journal of Science* 307, 1064-1095. DOI: 10.2475/09.2007.02
- [Allen, M. B., & Talebian, M. \(2011\). Structural variation along the Zagros and the nature of the Dezful Embayment. \*Geological Magazine\*, 148, 911-924. DOI: 10.1017/S0016756811000318](#)
- 15 [Allen, M. B., Saville, C., Blanc, E. P., Talebian, M., Nissen, E. \(2013\). Orogenic plateau growth: Expansion of the Turkish-Iranian Plateau across the Zagros fold-and-thrust belt. \*Tectonics\*, 32, 171-190. DOI: 10.1002/tect.20025](#)
- [Bahroudi, A, Koyi, H.A. \(2003\). Effect of spatial distribution of Hormuz salt on deformation style in the Zagros fold and Thrust Belt: An analogue modelling approach. \*Journal of the Geological Society\*, 160, 719-733](#)
- 20 Berberian, M., 1995. Master “blind” thrust faults hidden under the Zagros folds: Active tectonics and surface morphotectonics. *Tectonophysics*, 241, 193-224. DOI: 10.1016/0040-1951(94)00185-C

- Berberian, M., King, G.C.P. (1981) Towards a paleogeography and tectonic evolution of Iran. Canadian Journal of Earth Sciences, 18, 210-65. DOI: 10.1139/e81-019
- Blanc, E.J.-P., Allen, M.B., Inger, S., Hassani, H. (2003) Structural styles in the Zagros Simple Folded Zone, Iran. Journal of the Geological Society, 160, 401-412. DOI: 10.1144/0016-764902-110
- 5 Bordenave, M.L. (2008) The origin of the Permo-Triassic gas accumulations in the Iranian Zagros Foldbelt and contiguous offshore areas: A review of the palaeozoic petroleum system. Journal of Petroleum Geology, 31, 3-42. DOI: 10.1111/j.1747-5457.2005.tb00087.x
- 10 Butler, R.W.H., Mazzoli, S., Corrado, S., De Donatis, M., Di Bucci, D., Gambini, R., Naso, G., Nicolai, C., Scrocca, D., Shiner, P., Zucconi, V. (2004). Applying thick-skinned tectonic models to the Apennine thrust belt of Italy--Limitations and implications. AAPG Memoir, 82, 647-667.
- Cristallini, E.O., Ramos, V.A. (2000). Thick-skinned and thin-skinned thrusting in the La Ramada fold and thrust belt: crustal evolution of the High Andes of San Juan, Argentina (32 SL). Tectonophysics, 317, 205-235. DOI: 10.1016/S0040-1951(99)00276-0
- 15 Dahlstrom, C.D.A. (1969). Balanced cross sections. Canadian Journal of Earth Sciences, 6, 743-757. DOI: 10.1139/e69-069
- Davis, T.L. Namson, J., Yerkes, R.F. (1989) A cross section of the Los Angeles Area: Seismically active fold and thrust belt, The 1987 Wittier Narrows earthquake, and earthquake hazard. Journal of Geophysical Research: Solid Earth, 94, 9644-9664. DOI: 10.1029/JB094iB07p09644
- 20 English, J.M., Lunn, C.A., Ferreira, L., Yacu, G. (2015) Geologic evolution of the Iraqi Zagros, and its influence on the distribution of hydrocarbons in the Kurdistan region.

- American Association of Petroleum Geologists Bulletin, 99, 231-272. DOI: 10.1306/06271413205
- Falcon, N.L. (1961) Major earth-flexuring in the Zagros Mountains of south-west Iran. Quarterly Journal of the Geological Society of London, 117, 367-376. DOI: 10.1144/gsjgs.117.1.0367
- 5
- Ghasemi, A., Talbot, C.J. (2006) A new tectonic scenario for the Sanandaj-Sirjan Zone (Iran). Journal of Asian Earth Sciences, 26, 683-693. DOI: 10.1016/j.jseae.2005.01.003
- Hessami, K., Koyi, H.A., Talbot, C.J., Tabasi, H., Shabanian, E. (2001) Progressive unconformities within an evolving foreland fold-thrust belt, Zagros Mountains. Journal of the Geological Society, 158, 969-982. DOI: 10.1144/0016-764901-007
- 10
- Homke, S., Vergés, J., Serra-Kiel, J., Bernaola, G., Sharp, I., Garcés, M., Montero-Verdú, I., Karpuz, R., Goodarzi, M.H. (2009) Late Cretaceous-Paleocene formation of the proto-Zagros foreland basin, Lorestan Province, SW Iran. Bulletin of the Geological Society of America, 121, 7-8. DOI: 10.1130/B26035.1
- 15
- Hossack, J.R. (1979). The use of balanced cross-sections in the calculation of orogenic contraction: A review. Journal of the Geological Society, 136, 705-711. DOI: 10.1144/gsjgs.136.6.0705
- Jackson, J.A. (1980) Reactivation of basement faults and crustal shortening in orogenic belts. Nature, 283, 343-346. DOI: 10.1038/283343a0
- 20
- Jassim, S. Z., Goff, J. C. (2006) Geology of Iraq: Dolin, Prague and Moravian Museum, Brno, Czech Republic, 341 pp.
- Karim, K.H., Koyi, H., Baziany, M.M., Hessami, K. (2011) Significance of angular unconformities between Cretaceous and Tertiary strata in the northwestern segment of

the Zagros fold–thrust belt, Kurdistan. *Geological Magazine*, 148, 925-939. DOI:  
10.1017/S0016756811000471

5 | [Lawa, F. A., Koyi, H., Ibrahim, A. \(2013\). Tectono-stratigraphic evolution of the NW segment of the Zagros fold-thrust belt, Kurdistan, NE Iraq. \*Journal of Petroleum Geology\*, 36, 75-96. DOI: 10.1111/jpg.12543](#)

Kobayashi, T., Morishita, Y., Yurai, H., Fujiwara, S. (2018). InSAR-derived Crustal Deformation and Reverse Fault Motion of the 2017 Iran-Iraq Earthquake in the Northwest of the Zagros Orogenic Belt. *Bulletin of the Geospatial Information Authority of Japan*, in press.

10 | [Koshnaw, R. I., Horton, B. K., Stockli, D. F., Barber, D. E., Tamar-Agha, M. Y., Kendall, J. J. \(2017\). Neogene shortening and exhumation of the Zagros fold-thrust belt and foreland basin in the Kurdistan region of northern Iraq. \*Tectonophysics\*, 694, 332-355.](#)

15 | [Lacombe, O., Mouthereau, F. \(2002\). Basement-involved shortening and deep detachment tectonics in forelands of orogens: Insights from recent collision belts \(Taiwan, Western Alps, Pyrenees\). \*Tectonics\*, 21. DOI: 10.1029/2001TC901018](#)

Lacombe, O., Bellahsen, N. (2016). Thick-skinned tectonics and basement-involved fold–thrust belts: insights from selected Cenozoic orogens. *Geological Magazine*, 153, 763-810. DOI:10.1017/S0016756816000078

20 | Malekzade, Z., Bellier, O., Abbassi, M. R., Shabanian, E., Authemayou, C. (2016). The effects of plate margin inhomogeneity on the deformation pattern within west-Central Zagros Fold-and-Thrust Belt. *Tectonophysics*, 693, 304-326. DOI: 10.1016/j.tecto.2016.01.030

- Marshak, S. (1988), Kinematics of orocline and arc formation in thin-skinned orogens, *Tectonics*, 7, 73–86, DOI:10.1029/TC007i001p00073.
- Marshak, S., Karlstrom, K., Timmons, J.M. (2000) Inversion of Proterozoic extensional faults: An explanation for the pattern of Laramide and Ancestral Rockies intracratonic deformation, United States. *Geology*, 28, 735-738. DOI: 10.1130/0091-7613(2000)28<735:IOPEFA>2.0.CO;2
- 5
- McClay, K. R. (1989). Analogue models of inversion tectonics. Special Publications of the Geological Society of London, 44, 41-59. DOI: 10.1144/GSL.SP.1989.044.01.04
- Molinaro, M., Leturmy, P., Guezou, J.C., Frizon de Lamotte, D., Eshraghi, S.A. (2005) The structure and kinematics of the southeastern Zagros fold-thrust belt, Iran: From thin-skinned to thick-skinned tectonics. *Tectonics*, 24, 1-19. DOI: 10.1029/2004TC001633
- 10
- Mouthereau, F., Lacombe, O. (2006). Inversion of the Paleogene Chinese continental margin and thick-skinned deformation in the Western Foreland of Taiwan. *Journal of Structural Geology*, 28, 1977-1993. DOI:10.1016/j.jsg.2006.08.007
- 15
- Mouthereau, F., Lacombe, O., Meyer, B. (2006). The Zagros folded belt (Fars, Iran): constraints from topography and critical wedge modelling. *Geophysical Journal International*, 165, 336-356. DOI: 10.1111/j.1365-246X.2006.02855.x
- Mouthereau, F., Lacombe, O., Vergés, J. (2012) Building the Zagros collisional orogen: Timing, strain distribution and the dynamics of Arabia/Eurasia plate convergence. *Tectonophysics*, 532-535, 27-60. DOI: 10.1016/j.tecto.2012.01.022
- 20
- Mouthereau, F., Tensi, J., Bellahsen, N., Lacombe, O., De Boisgrollier, T., Kargar, S. (2007). Tertiary sequence of deformation in a thin-skinned/thick-skinned collision belt: The Zagros Folded Belt (Fars, Iran). *Tectonics*, 26, TC5006. DOI: 10.1029/2007TC002098

[Navabpour, P., Barrier, E., McQuilLan, H. \(2014\). Oblique oceanic opening and passive margin irregularity, as inherited in the Zagros fold-and-thrust belt. Terra Nova, 26, 208-215. DOI: 10.1111/ter.12088](#)

5 Nissen, E., Tatar, M., Jackson, J.A., Allen, M.B. (2011). New views on earthquake faulting in the Zagros fold-and-thrust belt of Iran. *Geophysical Journal International* 186, 928-944. DOI:10.1111/j.1365-246X.2011.05119.x

[Obaid, A. K., Allen, M. B. \(2017\). Landscape maturity, fold growth sequence and structural style in the Kirkuk Embayment of the Zagros, northern Iraq. Tectonophysics, 717, 27-40. DOI: 10.1016/j.tecto.2017.07.006](#)

10 Sadeghi, S., Yassaghi, A. (2016) Spatial evolution of Zagros collision zone in Kurdistan, NW Iran: constraints on Arabia–Eurasia oblique convergence. *Solid Earth*, 7, 659-672. DOI: 10.5194/se-7-659-2016

Saura, E., Garcia-Castellanos, D., Casciello, E., Parravano, V., Urruela, A., Vergés, J. (2015) Modeling the flexural evolution of the Amiran and Mesopotamian foreland basins of NW Zagros (Iran-Iraq). *Tectonics*, 34, 377-395. DOI: 10.1002/2014TC003660

Sepehr, M., Cosgrove, J.W. (2004) Structural framework of the Zagros Fold-Thrust Belt, Iran *Marine and Petroleum Geology*, 21, 829-843. DOI: 10.1016/j.marpetgeo.2003.07.006

Shaw, J.H., Suppe, J. (1996) Earthquake hazards of active blind-thrust faults under the central Los Angeles basin, California. *Journal of Geophysical Research*, 101, 8623-8642. DOI: 10.1029/95JB03453

20 Sibson, R.H. (1985) A note on fault reactivation. *Journal of Structural Geology*, 7, 751-754. DOI: 10.1016/0191-8141(85)90150-6

Talbot, C.J., Alavi, M. (1996). The past of a future syntaxis across the Zagros. Geological Society of America Special Paper, 100, 89-109

- 5 Talebian, M., Jackson, J. (2002) Offset on the Main Recent Fault of the NW Iran and implications for the late Cenozoic tectonics of the Arabia-Eurasia collision zone. *Geophysical Journal International*, 150, 422-439. DOI: 10.1046/j.1365-246X.2002.01711.x
- Talebian, M., Jackson, J.A. (2004) A reappraisal of earthquake focal mechanisms and active shortening in the Zagros mountains of Iran. *Geophysical Journal International* 156, 506-526. DOI: 10.1111/j.1365-246X.2004.02092.x
- 10 Tavani, S. (2012). Plate kinematics in the Cantabrian domain of the Pyrenean orogen. *Solid Earth*, 3, 265-292. DOI: 10.5194/se-3-265-2012
- Teknik, V., Ghods, A. (2017) Depth of magnetic basement in Iran based on fractal spectral analysis of aeromagnetic data. *Geophysical Journal International*, 209, 1878-1891. DOI: 10.1093/gji/ggx132
- 15 Utkucu, M. (2017). Preliminary seismological report on the November 12, 2017 Northern Iran/Western Iraq earthquake. Sakarya University, DOI:10.13140/RG.2.2.17781.27364.
- Vergés, J., Saura, E., Casciello, E., Fernández, M., Villaseñor, A., Jiménez-Munt, I., García-Castellanos, D. (2011) Crustal-scale cross-sections across the NW Zagros belt: implications for the Arabian margin reconstruction. *Geological Magazine*, 148, 739-20 761. DOI: 10.1017/S0016756811000331
- Vernant, P., Nilforoushan, F., Hatzfeld, D., Abbassi, M.R., Vigny, C., Masson, F., Nankali, H., Martinod, J., Ashtiani, A., Bayer, R., Tavakoli, F., Chéry, J. (2004) Present-day crustal deformation and plate kinematics in the Middle East constrained by GPS measurements



in Iran and northern Oman. *Geophysical Journal International*, 157, 381-398.  
DOI:10.1111/gji.2004.157.issue-1.

- 5 Wang, M., Jia, D., Shaw, J.H., Hubbard, J., Lin, A., Li, Y., Shen, L. (2013) Active fault-related folding beneath an alluvial terrace in the Southern Longmen Shan range front, Sichuan basin, China: Implications for seismic hazard. *Bulletin of the Seismological Society of America*, 103, 2369-2385. DOI: 10.1785/0120120188
- Wells, D.L., Coppersmith, K.J. (1994) New empirical relationships among magnitude, rupture length, rupture width, rupture area, and surface displacement. *Bulletin of the Seismological Society of America*, 84, 974-1002
- 10 Williams, G.D., Powell, C.M., Cooper, M.A. (1989) Geometry and kinematics of inversion tectonics. *Special Publications of the Geological Society of London*, 44, 3-15. DOI: 10.1144/GSL.SP.1989.044.01.02
- Yue, L.F., Suppe, J., Hung, J.H. (2005) Structural geology of a classic thrust belt earthquake: The 1999 Chi-Chi earthquake Taiwan ( $M_w = 7.6$ ). *Journal of Structural Geology*, 27, 15 2058-2083. DOI: 10.1016/j.jsg.2005.05.020
- Ziegler, A.M. (2001) Late Permian to Holocene paleofacies evolution of the Arabian Plate and its hydrocarbon occurrences. *GeoArabia*, 6, 445-504.
